# Supplementary material for: Oncolytic vaccinia virus reinvigorates peritoneal immunity and cooperates with immune checkpoint inhibitor to suppress peritoneal carcinomatosis in colon cancer
Source: J Immunother Cancer. 2020 Nov 16;8(2):e000857. doi: 10.1136/jitc-2020-000857 (PMC7670945; doi:10.1136/jitc-2020-000857)
Supplement: Supplementary data [file jitc-2020-000857supp002.xlsx]

## Sheet: Sheet1
Supplemental Table1. Full list of gene changes and adjusted P values
					FDR: 0.1
		Gene expression		Student's t-test	Benjamini-Hochberg
		Cont	JX	P-value	P-value	Significance
	Slamf1	3.58	16.8075	4.85312e-05	0.0060664	significant
	Tnf	11.045	35.725	0.000177926	0.0166806	significant
	Csf3r	12.58	69.6075	0.000234486	0.0195405	significant
	Il1rn	107.7	321.675	0.000247031	0.0631288	significant
	Irf1	906.322	1818.99	0.000309174	0.0631288	significant
	Egr1	134.243	213.413	0.000361474	0.0631288	significant
	Jak3	65.2425	124.087	0.000719373	0.0631288	significant
	Irak3	11.5625	27.925	0.000774264	0.0631288	significant
	Tfeb	58.0575	88.5025	0.000843346	0.0631288	significant
	Psmb9	538.165	857.572	0.00103652	0.0631288	significant
	Ccl3	49.35	144.25	0.00108523	0.0631288	significant
	Nt5e	11.4825	34.325	0.00124517	0.0631288	significant
	Il1b	27.7125	163.587	0.00126097	0.0631288	significant
	Xaf1	458.87	715.572	0.00126147	0.0631288	significant
	Il7r	15.1025	65.91	0.00129333	0.0631288	significant
	Stat4	9.5625	22.5425	0.0013604	0.0631288	significant
	Tnfaip3	63.2275	162.77	0.00146288	0.0631288	significant
	Clec7a	27.2025	146.89	0.00151509	0.0631288	significant
	Cd274	160.373	620.155	0.00173635	0.0685402	significant
	H2-Q10	8.8575	23.3775	0.00197919	0.0742196	significant
	Adora2a	3.3425	14.6775	0.00220499	0.0769437	significant
	Nos2	33.05	113.585	0.00240365	0.0769437	significant
	Traf6	151.62	201.787	0.00242563	0.0769437	significant
	Tlr6	19.8025	37.7025	0.00246969	0.0769437	significant
	Psmb10	720.573	1225.5	0.00256479	0.0769437	significant
	Il27	2.025	4.41	0.00278251	0.0802646	significant
	Nfatc1	58.1275	90.3925	0.00302304	0.0817593	significant
	Tnfsf14	7.72	27.675	0.00305235	0.0817593	significant
	Tdo2	10.7625	75.9525	0.00325916	0.0822487	significant
	Il18rap	104.205	157.15	0.00334437	0.0822487	significant
	Cxcr2	10.8675	63.3	0.00339961	0.0822487	significant
	Ccrl2	29.42	113.81	0.00357863	0.0838742	significant
	Xcl1	8.4025	28.525	0.00370681	0.0842457	significant
	Csf2rb	27.4275	128.835	0.0041559	0.08461	significant
	Il2rb	175.502	450.113	0.00420858	0.08461	significant
	Gzmb	209.637	400.412	0.00427075	0.08461	significant
	Fos	173.288	532.655	0.00427987	0.08461	significant
	Prg2	4.04	35.495	0.0042917	0.08461	significant
	Ripk2	134.175	184.83	0.00439972	0.08461	significant
	Fpr2	48.59	115.845	0.00488923	0.091673	significant
	Cd40lg	2.8525	9.72	0.00532312	0.0954769	significant
	Sell	84.13	418.647	0.00536445	0.0954769	significant
	Tnfrsf1b	114.827	242.262	0.00547401	0.0954769	significant
	Icos	23.9925	82.85	0.00578987	0.097	significant
	Tyk2	17.08	41.3475	0.00582	0.097	significant
	Irak2	43.47	128.815	0.00620677	0.0987667	significant
	Il1a	7.585	29.005	0.00637299	0.0987667	significant
	Cxcl11	38.06	87.8325	0.00642604	0.0987667	significant
	Ddx60	128.843	213.415	0.00650905	0.0987667	significant
	Gbp5	188.588	466.113	0.00668396	0.0987667	significant
	Cd7	7.0025	20.9225	0.00671614	0.0987667	significant
	Ikzf1	10.7525	33.97	0.00689756	0.099484	significant
	Nlrp3	13.8275	101.605	0.00723391	0.100652	not significant
	Cd14	88.6025	198.5	0.00728874	0.100652	not significant
	Tgfb1	763.2	975.043	0.00738112	0.100652	not significant
	Ikbke	42.4725	93.8275	0.00766757	0.101396	not significant
	Itgb3	22.515	41.4725	0.00770608	0.101396	not significant
	Tnfrsf13c	10.81	18.205	0.00811689	0.10496	not significant
	Cxcl10	2623.53	5306.12	0.00827443	0.105183	not significant
	Runx1	171.995	255.565	0.0084641	0.105801	not significant
	Ccl22	7.9275	27.9925	0.00890947	0.108056	not significant
	Irgm2	197.41	424.695	0.0089326	0.108056	not significant
	Aire	1.7625	4.265	0.00949551	0.113042	not significant
	Runx3	4.9375	14.5025	0.00971817	0.113206	not significant
	Gfi1	12.1825	20.5625	0.00981629	0.113206	not significant
	Cd69	20.2675	76.63	0.0102732	0.113206	not significant
	Rel	75.955	115.438	0.0103746	0.113206	not significant
	Map3k1	31.1575	69.05	0.010454	0.113206	not significant
	Ccl17	10.6425	50.2425	0.0105289	0.113206	not significant
	Icosl	24.5175	43.61	0.0107277	0.113206	not significant
	C7	4.79	8.905	0.0108399	0.113206	not significant
	Mavs	136.74	178.332	0.0108678	0.113206	not significant
	Itgb2	154.28	363.385	0.0113387	0.116493	not significant
	Cxcl9	150.847	736.55	0.0117646	0.117994	not significant
	Gata3	30.58	63.295	0.0117994	0.117994	not significant
	Nfkbia	179.9	250.905	0.0125161	0.123514	not significant
	Ccl5	306.403	689.22	0.0129434	0.125726	not significant
	Ticam2	12.4825	24.545	0.0131298	0.125726	not significant
	Mx1	1.7825	3.935	0.0132432	0.125726	not significant
	Ccnd3	167.058	246.665	0.0134278	0.125886	not significant
	Itk	7.7375	22.7975	0.0141213	0.127194	not significant
	Arg2	9.6575	27.4425	0.014668	0.127194	not significant
	Il12rb1	45.9575	97.525	0.0146934	0.127194	not significant
	Stat1	754.73	1428.35	0.0148641	0.127194	not significant
	Tap1	1229.32	1636.79	0.014882	0.127194	not significant
	Cd53	10.58	33.37	0.0152333	0.127194	not significant
	H2-M3	389.41	499.248	0.0154342	0.127194	not significant
	Tap2	158.69	274.638	0.0155908	0.127194	not significant
	Ccl4	28.5625	65.965	0.0156429	0.127194	not significant
	Itgb4	91.565	58.9875	0.0156656	0.127194	not significant
	Osm	29.0675	95.325	0.0158838	0.127194	not significant
	Cd40	48.475	90.1725	0.0159282	0.127194	not significant
	Cd80	25.4225	46.42	0.0159914	0.127194	not significant
	Cd1d2	3.96	9.815	0.0160901	0.127194	not significant
	Il13ra1	1104.49	1354.43	0.0161932	0.127194	not significant
	Cd160	7.4125	28.7875	0.0162808	0.127194	not significant
	Oasl1	339.465	538.197	0.016985	0.131327	not significant
	Thbs1	268.78	609.895	0.0173199	0.132493	not significant
	Chil3	313.11	3040.03	0.017628	0.132493	not significant
	Ccl19	11.3425	32.7575	0.0176657	0.132493	not significant
	Nlrc5	150.36	297.083	0.0185048	0.137412	not significant
	Cd97	33.42	109.148	0.0187875	0.138143	not significant
	Fn1	4756.64	6286.84	0.0189836	0.13823	not significant
	Cxcl3	29.8275	73.5	0.0194942	0.139827	not significant
	Il6	8.0425	50.3825	0.0195767	0.139827	not significant
	Cd1d1	64.52	99.895	0.0197622	0.139827	not significant
	Cd83	12.71	39.78	0.0200489	0.14053	not significant
	Zbp1	1277.84	1981.42	0.0206484	0.14234	not significant
	Cyfip2	48.19	105.618	0.0206867	0.14234	not significant
	Nod1	50.4225	114.773	0.021249	0.144559	not significant
	Il15	54.7175	81.9225	0.0213948	0.144559	not significant
	Plaur	532.658	1046.39	0.0215954	0.144612	not significant
	Pou2af1	4.555	12.7275	0.0220339	0.145435	not significant
	Gpr44	4.6075	13.1725	0.0221196	0.145435	not significant
	Ptgs2	176.933	333.827	0.0223001	0.145435	not significant
	Ciita	2.3275	9.145	0.0225038	0.14547	not significant
	Klra20	1.18	3.015	0.0226933	0.14547	not significant
	Il1r2	34.225	166.712	0.0230068	0.14623	not significant
	C6	7.8325	19.7025	0.0240931	0.151281	not significant
	Tapbp	702.935	1061.44	0.024205	0.151281	not significant
	Tnfrsf13b	4.1875	9.24	0.0247794	0.153592	not significant
	Ifng	5.73	16.29	0.0255156	0.154575	not significant
	Psmb8	2200.9	3017.64	0.0256088	0.154575	not significant
	Zap70	10.115	50.7525	0.0257853	0.154575	not significant
	Klra6	14.6725	31.6125	0.0267817	0.154575	not significant
	Hif1a	1526.05	1856.9	0.0267978	0.154575	not significant
	Rsad2	771.062	1177.19	0.0267978	0.154575	not significant
	Gzma	74.6725	347.488	0.0269897	0.154575	not significant
	Il11ra1	8.4125	15.99	0.0271693	0.154575	not significant
	Ido1	12.5875	28.895	0.0272029	0.154575	not significant
	Lcn2	212.755	1149.51	0.0272918	0.154575	not significant
	Il15ra	60.345	95.0475	0.0276096	0.154575	not significant
	H2-DMb2	8.805	20.02	0.0276701	0.154575	not significant
	Cyld	65.5825	97.03	0.0278957	0.154575	not significant
	Anp32b	3192.7	3810.31	0.0280144	0.154575	not significant
	Rag1	1.7825	8.79	0.0283216	0.154575	not significant
	Irf2	344.885	453.317	0.0283927	0.154575	not significant
	Cd86	27.1875	97.3825	0.028646	0.154575	not significant
	Klrc1	33.495	119.622	0.0289144	0.154575	not significant
	Cxcl2	42.9725	144.66	0.0292835	0.154575	not significant
	Sbno2	107.45	193.47	0.0294231	0.154575	not significant
	Trem1	12.4175	42.1625	0.0295297	0.154575	not significant
	Ccl2	4688.07	6883.68	0.0296015	0.154575	not significant
	Serpinb2	27.06	182.007	0.0296785	0.154575	not significant
	Cmpk2	497.113	698.875	0.0310736	0.159487	not significant
	Tlr2	40.325	81.585	0.0311588	0.159487	not significant
	Cd244	72.7025	108.817	0.0312594	0.159487	not significant
	Psma2	2103.54	2501.34	0.0316737	0.160509	not significant
	Il12a	3.64	6.625	0.0319328	0.16068	not significant
	Lag3	18.7425	52.9725	0.0325017	0.16068	not significant
	Il1rl2	4.165	25.5925	0.032513	0.16068	not significant
	Hcst	20.27	64.235	0.0328038	0.16068	not significant
	Dpp4	6.065	34.0875	0.0328523	0.16068	not significant
	Ambp	6.04	9.67	0.0331353	0.16068	not significant
	Pdcd1	26.6525	84.8625	0.0334228	0.16068	not significant
	Tek	15.3425	8.7075	0.0335658	0.16068	not significant
	Cd6	4.195	22.8375	0.0336357	0.16068	not significant
	Hspb2	10.775	24.555	0.0350239	0.166253	not significant
	St6gal1	14.2625	34.73	0.0353142	0.166576	not significant
	Cxcr3	8.065	43.725	0.0358953	0.168259	not significant
	Cd34	2563.01	1951.86	0.0361431	0.168369	not significant
	Ccl7	533.533	779.382	0.0366259	0.169564	not significant
	Itgax	3.7525	8.2675	0.0368977	0.169775	not significant
	Serping1	134.803	819.607	0.0378325	0.172213	not significant
	Socs3	47.69	91.905	0.037887	0.172213	not significant
	Elane	5.635	22.5875	0.0386381	0.174348	not significant
	Cd4	4.5925	14.065	0.0388216	0.174348	not significant
	Ccr2	32.625	164.403	0.0402462	0.179189	not significant
	Cd247	10.185	34.9675	0.0403773	0.179189	not significant
	Klrc2	7.7275	24.535	0.040739	0.179226	not significant
	Ccr1	77.21	197.985	0.0408983	0.179226	not significant
	Tnfsf18	3.54	12.905	0.0411025	0.179226	not significant
	Cd2	3.24	14.62	0.0415452	0.180109	not significant
	Il6st	88.2425	151.132	0.041961	0.180867	not significant
	Ncf4	89.615	220.665	0.0425432	0.182328	not significant
	Egr3	5.0875	13.7775	0.042943	0.182416	not significant
	Colec12	52.855	70.45	0.0435567	0.182416	not significant
	C2	75.695	122.58	0.0436296	0.182416	not significant
	Mill2	10.735	19.895	0.0437742	0.182416	not significant
	Fasl	4.55	11.665	0.0437869	0.182416	not significant
	Irf4	4.72	11	0.0440231	0.182416	not significant
	Ccl24	7.4	29.515	0.0450283	0.185556	not significant
	Tnfrsf14	75.7125	160.43	0.0453213	0.185743	not significant
	Ifit3	784.685	1253.37	0.0457883	0.186557	not significant
	Clec4n	57.8975	158.825	0.0460174	0.186557	not significant
	Cd33	31.455	94.4625	0.0471977	0.189204	not significant
	Cd8b1	6.505	28.68	0.047511	0.189204	not significant
	Il6ra	94.98	128.665	0.047641	0.189204	not significant
	App	1068.18	1472.09	0.0479587	0.189204	not significant
	Cxcl14	17.985	55.4925	0.0481563	0.189204	not significant
	Fas	70.5675	139.465	0.0485051	0.189204	not significant
	Icam1	57.9025	108.08	0.0486761	0.189204	not significant
	Ptprc	72.7875	231.155	0.0486884	0.189204	not significant
	Tnfrsf1a	664.418	870.115	0.0491455	0.189996	not significant
	Ccl6	253.205	758.8	0.0494939	0.190218	not significant
	Atg10	87.455	112.548	0.0497393	0.190218	not significant
	Il1r1	120.748	238.257	0.0501408	0.190218	not significant
	Socs1	227.998	293.655	0.0502176	0.190218	not significant
	Mpo	5.995	26.5175	0.050822	0.191023	not significant
	Cd3e	8.4025	45.275	0.0509394	0.191023	not significant
	S100a8	382.812	10210.4	0.0518234	0.193371	not significant
	Pycard	5.3875	10.58	0.0526986	0.194761	not significant
	Defb1	4.225	17.22	0.0527153	0.194761	not significant
	Cma1	9.8	24.4775	0.0530296	0.194962	not significant
	Cd164	1456.37	1783.66	0.053618	0.196164	not significant
	Egfr	23.125	44.87	0.0546799	0.199077	not significant
	Il18r1	9.9375	51.7025	0.0556068	0.201474	not significant
	Ceacam1	10.78	21.98	0.0559528	0.201753	not significant
	Cmah	3.94	8.91	0.0563093	0.202021	not significant
	Mefv	11.0575	22.37	0.0566645	0.202021	not significant
	Psmd7	1423.21	1702.91	0.0568765	0.202021	not significant
	Bst1	96.6125	235.148	0.0575042	0.202021	not significant
	Bid	217.985	239.723	0.0577664	0.202021	not significant
	Klra2	60.1075	130.738	0.0582359	0.202021	not significant
	Ep300	217.183	309.08	0.0582531	0.202021	not significant
	Cd74	177.7	1218.72	0.0583866	0.202021	not significant
	Itga4	17.055	63.9925	0.0584515	0.202021	not significant
	Gbp2b	8.3125	19.735	0.0587229	0.202028	not significant
	Cxcr4	51.5075	77.57	0.0601252	0.205908	not significant
	Ctsw	19.6925	101.037	0.0613713	0.20922	not significant
	Ltb	10.31	51.175	0.0619711	0.209804	not significant
	Jak2	210.255	279.787	0.0623736	0.209804	not significant
	Egr2	4.385	9.905	0.0623817	0.209804	not significant
	Ctla4	37.0875	95.4175	0.0634207	0.212346	not significant
	Ly96	229.337	275.165	0.0641302	0.213767	not significant
	Il3ra	10.155	34.1875	0.0654556	0.216763	not significant
	Cdk1	7.1525	11.9475	0.0658333	0.216763	not significant
	Birc5	299.68	360.855	0.0662698	0.216763	not significant
	Cd99	168.82	238.335	0.0664478	0.216763	not significant
	Itch	819.832	993.048	0.066688	0.216763	not significant
	Gzmm	3.7475	10.1625	0.0667629	0.216763	not significant
	Plau	100.627	261.795	0.0674182	0.217056	not significant
	Ifit2	247.655	395.5	0.0674322	0.217056	not significant
	Itgal	37.9175	109.968	0.0690878	0.221062	not significant
	Clec5a	30.7875	72.575	0.0693534	0.221062	not significant
	Tab1	150.607	171.855	0.0695608	0.221062	not significant
	Prdm1	12.3025	21.99	0.0706403	0.223545	not significant
	Cxcl1	95.5625	147.678	0.0709561	0.223601	not significant
	Slamf7	52.4325	111.47	0.0739645	0.232106	not significant
	Gtf3c1	164.94	205.977	0.076096	0.2378	not significant
	Abcg1	74.7825	181.505	0.0776753	0.241728	not significant
	Herc6	364.067	468.332	0.0780275	0.241821	not significant
	Casp1	1547.86	1797.33	0.0784408	0.242101	not significant
	CD209e	4.2375	14.0425	0.0789801	0.242294	not significant
	Amica1	37.805	88.2975	0.0791493	0.242294	not significant
	Arg1	559.12	1719.35	0.0800118	0.242918	not significant
	Ccr3	3.015	9.1975	0.0808706	0.242918	not significant
	Camp	29.97	471.717	0.0808974	0.242918	not significant
	H2-T23	336.42	1038.63	0.0809369	0.242918	not significant
	H2-Eb1	40.3775	234.775	0.0809728	0.242918	not significant
	Card11	11.69	29.375	0.0820263	0.243459	not significant
	Ikbkg	82.2875	105.455	0.0822183	0.243459	not significant
	Casp8	427.335	546.005	0.0826508	0.243459	not significant
	Tbk1	115.825	143.663	0.0826815	0.243459	not significant
	Cd5	4.67	16.1725	0.082776	0.243459	not significant
	Ifnb1	7.5675	20.41	0.0843843	0.24722	not significant
	Pdcd1lg2	5.3275	19.0825	0.0857498	0.249589	not significant
	Foxp3	2.405	4.8075	0.08605	0.249589	not significant
	Il22ra1	5.015	12.075	0.0863839	0.249589	not significant
	Atf2	229.043	296.205	0.0865242	0.249589	not significant
	Rps6	341.055	269.875	0.0903679	0.259302	not significant
	Itga5	228.94	286.588	0.0905828	0.259302	not significant
	Mapk1	900.462	1034.9	0.0912152	0.260119	not significant
	Cr2	2.9225	8.005	0.0919846	0.26042	not significant
	Tnfrsf11b	3.475	10.175	0.092015	0.26042	not significant
	Smn1	727.508	858.225	0.0925332	0.260902	not significant
	Cd96	5.36	15.31	0.0938694	0.263678	not significant
	H2-Ab1	79.385	463.447	0.0950964	0.266128	not significant
	Il2	2.2575	10.18	0.0963749	0.268643	not significant
	Prkcd	598.362	719.64	0.0967114	0.268643	not significant
	Tbx21	6.6525	11.34	0.0985323	0.271548	not significant
	Ly9	29.8175	50.975	0.0985384	0.271548	not significant
	A2m	6.7075	111.703	0.099324	0.271548	not significant
	Oas3	96.3725	144.83	0.0994728	0.271548	not significant
	Tmem173	77	113.525	0.0995675	0.271548	not significant
	Masp2	2.725	7.0375	0.100111	0.272041	not significant
	Mst1r	8.2325	17.195	0.101622	0.273824	not significant
	Cklf	71.9225	84.435	0.101815	0.273824	not significant
	Ccl1	14.175	28.295	0.101862	0.273824	not significant
	H2-Aa	111.558	822.263	0.102603	0.274507	not significant
	Tal1	4.15	13.935	0.102848	0.274507	not significant
	Vhl	110.025	144.665	0.103734	0.275887	not significant
	Havcr2	75.7975	107.953	0.104529	0.276907	not significant
	Thy1	166.188	267.11	0.10499	0.276907	not significant
	Pax5	4.1875	9.48	0.105225	0.276907	not significant
	Tlr1	16.6225	39.2925	0.105945	0.277828	not significant
	C3	258.858	968.753	0.106714	0.278418	not significant
	Pparg	9.745	15.95	0.106912	0.278418	not significant
	Cd3d	60.2725	167.85	0.107903	0.280025	not significant
	Casp3	734.975	814.392	0.111005	0.28705	not significant
	Ccl11	59.4675	81.065	0.111679	0.28705	not significant
	Il21r	13.6275	33.215	0.112029	0.28705	not significant
	Litaf	366.317	425.877	0.112153	0.28705	not significant
	Pin1	22.0125	33.9125	0.112732	0.28705	not significant
	Muc1	10.9025	14.4525	0.112907	0.28705	not significant
	Tnfrsf18	4.755	11.0175	0.113604	0.287693	not significant
	Cd8a	18.6325	67.52	0.114164	0.287693	not significant
	Tfrc	2974.04	4043.72	0.11431	0.287693	not significant
	Il24	1.885	4.8775	0.11712	0.293031	not significant
	Dock9	94.15	124.337	0.117212	0.293031	not significant
	Klra3	3.5025	11.835	0.118075	0.293602	not significant
	Cd37	80.675	143.642	0.118444	0.293602	not significant
	Bcl2	30.1025	42.555	0.118615	0.293602	not significant
	Creb5	44.77	57.86	0.12087	0.297545	not significant
	Itga2	5.865	10.285	0.121002	0.297545	not significant
	Klra7	23.25	33.015	0.121814	0.298565	not significant
	Pik3cg	18.9625	30.9575	0.122387	0.29899	not significant
	Atm	202.64	269.588	0.123841	0.301561	not significant
	Col3a1	7614.7	5998.87	0.124945	0.303266	not significant
	Slc7a11	58.225	95.2475	0.129049	0.312216	not significant
	Lck	15.8725	63.5825	0.131721	0.314452	not significant
	Mnx1	2.545	9.4625	0.13182	0.314452	not significant
	Thbd	43.025	90.75	0.131859	0.314452	not significant
	F2rl1	2.755	11.3575	0.131904	0.314452	not significant
	Isg20	378.195	455.58	0.13207	0.314452	not significant
	Ifnar1	376.955	447.685	0.132902	0.315432	not significant
	Prf1	214.01	325.428	0.133619	0.316133	not significant
	Ccl20	1.9525	8.1175	0.13433	0.316817	not significant
	Tnfsf13b	33.705	48.8825	0.135194	0.317641	not significant
	Pik3cd	28.6675	73.825	0.135527	0.317641	not significant
	Cebpb	1002.87	1199.12	0.13657	0.318161	not significant
	Itgam	130.157	253.418	0.136947	0.318161	not significant
	Nfatc2	17.11	30.2125	0.13723	0.318161	not significant
	Atg16l1	286.413	331.43	0.138472	0.318161	not significant
	Map2k4	247.417	285.647	0.138731	0.318161	not significant
	Ms4a1	4.4975	10.1125	0.138808	0.318161	not significant
	Klrk1	34.075	78.56	0.13908	0.318161	not significant
	Crebbp	362.293	458.678	0.139143	0.318161	not significant
	Gzmk	6.95	58.62	0.139764	0.318612	not significant
	Ets1	768.405	907.727	0.140258	0.318769	not significant
	Cd3g	30.69	149.425	0.141141	0.319197	not significant
	Epsti1	3.145	6.305	0.141298	0.319197	not significant
	Fcer2a	2.945	9.6575	0.144416	0.325261	not significant
	Ccl25	45.43	62.695	0.145675	0.327115	not significant
	Csf2	4.775	12.4575	0.146816	0.328693	not significant
	Cxcl5	38.335	64.99	0.147518	0.329281	not significant
	Creb1	161.735	200.457	0.148765	0.331079	not significant
	Ccl8	558.155	2358.12	0.149431	0.331303	not significant
	Stat2	373.933	464.035	0.149749	0.331303	not significant
	Il4ra	150.535	268.635	0.15095	0.332638	not significant
	Batf	22.74	36.5775	0.151677	0.332638	not significant
	Cxcr6	17.4925	117.42	0.151707	0.332638	not significant
	Cspg4	47.4275	33.2925	0.152126	0.332638	not significant
	Xcr1	4.8225	8.4125	0.154726	0.337338	not significant
	Ikzf2	28.28	43.43	0.155213	0.337419	not significant
	Tnfrsf4	4.6975	8.69	0.156476	0.339183	not significant
	Il22	4.7475	2.84	0.157155	0.339672	not significant
	Ltf	3.6125	8.3675	0.159028	0.340686	not significant
	Ticam1	36.24	45.435	0.159172	0.340686	not significant
	Itga1	76.7575	99.3825	0.159614	0.340686	not significant
	Il12b	5.42	13	0.159777	0.340686	not significant
	Lif	47.265	71.6875	0.159895	0.340686	not significant
	Spn	77.08	97.725	0.162135	0.342323	not significant
	Bcl10	569.935	622.352	0.162395	0.342323	not significant
	Cxcl15	4.14	12.0125	0.162684	0.342323	not significant
	Il16	12.7675	28.5425	0.162939	0.342323	not significant
	Il7	22.9875	28.705	0.163053	0.342323	not significant
	Selplg	172.978	303.442	0.163402	0.342323	not significant
	Tollip	342.692	387.155	0.164203	0.342904	not significant
	Il5ra	5.585	12.09	0.164594	0.342904	not significant
	Psen2	147.713	182.045	0.166612	0.34502	not significant
	Pml	188.89	233.012	0.166714	0.34502	not significant
	Smpd3	18.935	28.6775	0.167311	0.34502	not significant
	Inpp5d	23.2875	45.4625	0.16745	0.34502	not significant
	Igf1r	133.64	167.567	0.168689	0.34662	not significant
	C4b	170.645	339.48	0.170145	0.348658	not significant
	C1qbp	2266.43	2494.64	0.17092	0.34869	not significant
	Rela	239.067	292.25	0.171305	0.34869	not significant
	H2-Dma	108.438	189.845	0.171555	0.34869	not significant
	Lyn	139.787	233.52	0.172101	0.348853	not significant
	Trp53	320.868	399.368	0.173377	0.350492	not significant
	Lyz2	2070.73	6411.97	0.174887	0.351552	not significant
	Syk	40.175	72.91	0.175162	0.351552	not significant
	Cfd	101.398	42.81	0.175307	0.351552	not significant
	Ythdf2	322.4	369.04	0.17674	0.35348	not significant
	Ewsr1	1311.26	1477.24	0.178092	0.35407	not significant
	Cd79b	18.805	13.9975	0.178432	0.35407	not significant
	Il4	4.1075	9.21	0.178451	0.35407	not significant
	Ccr4	4.195	7.7975	0.180996	0.358171	not significant
	Fadd	25.3225	34.4275	0.183213	0.361604	not significant
	Fut7	8.1625	16.305	0.185515	0.36395	not significant
	Reps1	247.868	286.71	0.185675	0.36395	not significant
	Ifngr1	430.135	555.885	0.185857	0.36395	not significant
	Il12rb2	2.535	10.4125	0.186376	0.364016	not significant
	Cd59b	5.1475	10.7725	0.187263	0.364797	not significant
	Tnfsf10	35.47	54.14	0.189212	0.36764	not significant
	H2-DMb1	101.338	137.778	0.189956	0.368131	not significant
	Abl1	145.533	176.37	0.190501	0.368236	not significant
	Cfb	138.945	262.63	0.1921	0.369487	not significant
	Tgfbr2	368.725	482.53	0.192133	0.369487	not significant
	Nfkb2	1003.38	1241.59	0.193406	0.369768	not significant
	Itgae	8.5425	16.73	0.193678	0.369768	not significant
	Cxcr1	3.21	7.6175	0.193819	0.369768	not significant
	Klrb1	4.1325	5.9275	0.194251	0.369768	not significant
	Relb	253.073	298.637	0.195268	0.370762	not significant
	Crp	5.03	11.905	0.196733	0.372142	not significant
	Csf3	5.3075	14.585	0.197092	0.372142	not significant
	Tpsab1	5.3025	9.9575	0.197484	0.372142	not significant
	Klrb1c	7.84	13.1325	0.199842	0.37494	not significant
	Cfi	5.6075	12.76	0.199968	0.37494	not significant
	Ifna4	4.88	15.2225	0.200581	0.375151	not significant
	Tie1	66.1375	45.9625	0.20289	0.378526	not significant
	Il23r	3.2925	9.63	0.204978	0.38122	not significant
	Sh2b2	66.0875	82.4175	0.205351	0.38122	not significant
	Irf5	104.41	164.645	0.206678	0.382602	not significant
	Mme	10.7675	18.0175	0.207713	0.382602	not significant
	Klra1	1.94	8.365	0.207807	0.382602	not significant
	Ebi3	14.59	21.1025	0.208136	0.382602	not significant
	Cd180	98.435	192.928	0.208701	0.382703	not significant
	C3ar1	226.755	416.15	0.209702	0.383602	not significant
	Il21	5.53	12.43	0.211974	0.386813	not significant
	Tfe3	138.535	167.075	0.213751	0.388411	not significant
	Kdr	38.37	24.28	0.213885	0.388411	not significant
	Pecam1	131.287	105.975	0.215285	0.389877	not significant
	Lcp1	389.295	658.722	0.215732	0.389877	not significant
	Sele	3.2825	6.6625	0.218148	0.392847	not significant
	Cybb	127.028	279.35	0.218423	0.392847	not significant
	Tnfsf15	6.0075	11.7475	0.221796	0.39796	not significant
	Ctsg	47.4075	36.555	0.22438	0.399935	not significant
	Nod2	10.225	18.345	0.224386	0.399935	not significant
	Lilra5	6.1025	10.1925	0.224497	0.399935	not significant
	Ppbp	38.4375	27.4275	0.226371	0.40202	not significant
	Cd68	508.778	792.818	0.226739	0.40202	not significant
	Pnma1	2.84	4.5675	0.228781	0.403947	not significant
	Btla	11.56	19.745	0.228903	0.403947	not significant
	F12	3.5175	4.43	0.229799	0.404064	not significant
	Mapk8	312.832	365.475	0.230047	0.404064	not significant
	Sh2d1a	9.9975	27.015	0.231556	0.405764	not significant
	Blk	2.405	7.095	0.233333	0.406864	not significant
	Cd84	65.61	133.553	0.233661	0.406864	not significant
	Xbp1	786.422	874.623	0.233988	0.406864	not significant
	Ccr7	23.27	32.2775	0.234354	0.406864	not significant
	Cd55	61.1575	81.915	0.236177	0.408098	not significant
	Ccl21a	16.7175	30.995	0.236497	0.408098	not significant
	Dusp4	175.382	281.683	0.236697	0.408098	not significant
	Tigit	19.51	27.3975	0.239506	0.411966	not significant
	Snai1	170.67	203.155	0.241049	0.411966	not significant
	Ifna1	15.4525	64.6975	0.241123	0.411966	not significant
	Lta	7.98	13.7125	0.241137	0.411966	not significant
	Il1rl1	1459.48	1821.4	0.242817	0.413892	not significant
	Gpi1	3041.32	3612.4	0.243464	0.414055	not significant
	Ccl9	951.065	1679.42	0.244806	0.414122	not significant
	Fez1	4.6325	8.8075	0.244876	0.414122	not significant
	Il17a	2.9175	7.395	0.24516	0.414122	not significant
	Il19	7.3425	15.0825	0.247063	0.416399	not significant
	Fcer1a	8.995	14.485	0.249203	0.417708	not significant
	C8a	3.25	11.015	0.249412	0.417708	not significant
	Il13	4.6875	10.195	0.249511	0.417708	not significant
	Itga6	141.29	184.715	0.251886	0.420746	not significant
	Chuk	587.535	705.372	0.252458	0.420764	not significant
	Cd200r1	39.5525	61.63	0.254988	0.423282	not significant
	Klrd1	140.343	214.327	0.255098	0.423282	not significant
	Irak1	138.558	160.055	0.255935	0.423521	not significant
	Ccr6	5.815	9.9925	0.256371	0.423521	not significant
	Tnfsf13	6.9325	10.78	0.258714	0.426451	not significant
	Il34	220.102	186.142	0.261142	0.42951	not significant
	H2-Q2	3.91	8.2575	0.262813	0.431312	not significant
	Cd70	3.8075	7.22	0.263622	0.431695	not significant
	Dmbt1	8.8225	5.13	0.265071	0.432636	not significant
	Slamf6	3.1375	10.0225	0.26535	0.432636	not significant
	C1s1	218.683	307.942	0.268829	0.437358	not significant
	Map2k1	700.652	808.21	0.271009	0.439949	not significant
	Btk	26.72	41.2625	0.273236	0.442608	not significant
	Mbl2	4.41	11.2675	0.274723	0.443329	not significant
	Atg7	144.31	166.113	0.274864	0.443329	not significant
	Isg15	1125.28	1381.34	0.275776	0.443846	not significant
	Mx2	67.845	87.5725	0.280633	0.450695	not significant
	Mif	5747.64	7154.92	0.281373	0.450919	not significant
	Ikbkb	260.695	308.125	0.283288	0.452301	not significant
	Cd3eap	55.685	62.2225	0.283442	0.452301	not significant
	Cd79a	3.46	8.535	0.284228	0.452592	not significant
	Il10ra	27.72	47.52	0.285363	0.453437	not significant
	Nfkb1	590.358	645.878	0.287564	0.455605	not significant
	Bcl2l1	323.157	358.772	0.28804	0.455605	not significant
	Cd28	12.37	19.58	0.28855	0.455605	not significant
	Usp18	209.438	255.16	0.290481	0.457189	not significant
	Il11	7.705	10.4825	0.290772	0.457189	not significant
	Stat6	498.705	549.975	0.291559	0.457467	not significant
	Pmch	5.195	10.645	0.292846	0.458527	not significant
	Cd38	148.648	240.312	0.293619	0.458779	not significant
	Ifih1	516.237	596.532	0.294285	0.458864	not significant
	Tank	221.4	261.94	0.297491	0.462147	not significant
	Icam4	9.0875	15.9175	0.297623	0.462147	not significant
	Cmklr1	50.1025	90.765	0.302681	0.468433	not significant
	Tlr3	71.0425	92.08	0.303047	0.468433	not significant
	Irf7	277.928	363.623	0.303545	0.468433	not significant
	Cd81	4155.71	3930.63	0.305039	0.468877	not significant
	Lrrn3	7.5525	10.535	0.305083	0.468877	not significant
	Il25	6.02	13.02	0.307806	0.472094	not significant
	Fcer1g	229.653	353.067	0.310087	0.472651	not significant
	Pvr	215.412	260.02	0.310313	0.472651	not significant
	Klra27	3.1675	4.255	0.31061	0.472651	not significant
	Tnfsf11	14.9375	21.8925	0.310689	0.472651	not significant
	Stat3	715.148	810.97	0.315965	0.478824	not significant
	Tnfrsf12a	1238.46	1434.93	0.316024	0.478824	not significant
	Txk	10.735	15.305	0.317193	0.479626	not significant
	Cd19	4.265	8.0625	0.319457	0.482078	not significant
	Ctsh	324.865	531.82	0.321874	0.484751	not significant
	Tlr4	146.525	173.832	0.324119	0.485368	not significant
	Traf2	268.35	316.258	0.324857	0.485368	not significant
	Tgfbr1	142.262	165.135	0.32502	0.485368	not significant
	H2-K1	3789.02	4190.28	0.325799	0.485368	not significant
	Ctss	940.312	1643.93	0.327484	0.485368	not significant
	Tnfrsf17	8.83	12.035	0.327574	0.485368	not significant
	Jak1	711.16	804.908	0.3281	0.485368	not significant
	Hras	5.6325	10.805	0.329334	0.485368	not significant
	Bcl6	41.0325	49.82	0.329586	0.485368	not significant
	Cdkn1a	272.522	316.67	0.329668	0.485368	not significant
	Cd207	4.8175	6.7125	0.329867	0.485368	not significant
	Rora	29.295	36.36	0.33005	0.485368	not significant
	Zfp13	9.5325	13.3475	0.330995	0.485805	not significant
	Gpr183	9.5375	12.8975	0.332127	0.485973	not significant
	Slc11a1	54.8425	71.5325	0.332406	0.485973	not significant
	Il17rb	3.7475	8.1275	0.334135	0.487551	not significant
	Irf8	80.3675	116.667	0.341496	0.497325	not significant
	Notch1	174.385	214.17	0.343879	0.499608	not significant
	Ccr9	5.795	10.2175	0.344397	0.499608	not significant
	Col1a1	819.528	1209.7	0.348493	0.504575	not significant
	Entpd1	55.2275	85.6775	0.349558	0.505142	not significant
	Ccr5	65.5525	114.522	0.352542	0.507548	not significant
	Cx3cl1	25.275	33.06	0.352576	0.507548	not significant
	Raet1	371.34	400.113	0.35481	0.509785	not significant
	Mfge8	189.355	160.595	0.358223	0.51327	not significant
	Oas2	333.605	419.647	0.359225	0.51327	not significant
	Itgb1	3040.41	3417.17	0.359616	0.51327	not significant
	Cd36	102.422	77.6	0.360445	0.51327	not significant
	Mertk	36.235	52.405	0.361225	0.51327	not significant
	Ccr8	7.45	10.07	0.361342	0.51327	not significant
	Smad4	486.812	542.475	0.362442	0.513859	not significant
	Tnfrsf8	3.4025	5.1025	0.364562	0.515889	not significant
	Il2ra	67.2825	89.59	0.366199	0.517023	not significant
	Alcam	39.655	46.815	0.367877	0.517023	not significant
	Eomes	38.375	45.1825	0.367956	0.517023	not significant
	Klrg1	27.285	36.7125	0.369099	0.517023	not significant
	Ifnl2	6.9575	14.3925	0.369178	0.517023	not significant
	Mr1	159.142	142.153	0.369499	0.517023	not significant
	Tlr9	17.88	25.6025	0.372594	0.520383	not significant
	Klra5	11.51	9.0675	0.37599	0.52415	not significant
	Maf	50.8625	66.4275	0.376828	0.524234	not significant
	Igf2r	170.84	211.763	0.377706	0.524234	not significant
	Ifna2	5.7075	11.4425	0.378754	0.524234	not significant
	Mapk11	49.81	60.2625	0.378847	0.524234	not significant
	Klra4	129.975	148.56	0.381515	0.526955	not significant
	Smad3	169.25	201.548	0.383682	0.528817	not significant
	Timd4	9.3825	15.1025	0.384395	0.528817	not significant
	C1ra	457.157	540.013	0.384979	0.528817	not significant
	Csf1r	118.012	199.265	0.392487	0.538144	not significant
	Ifi44l	7.8675	13.84	0.394448	0.53922	not significant
	Irak4	132.46	150.6	0.394709	0.53922	not significant
	Bst2	4025.34	4613.4	0.39626	0.540349	not significant
	Csf1	533.567	595.415	0.396977	0.540349	not significant
	Lamp3	4.495	8.2325	0.399467	0.542754	not significant
	Nfatc4	26.985	34.5425	0.40162	0.543964	not significant
	Mapk14	472.41	508.905	0.401808	0.543964	not significant
	Hck	54.1225	76.905	0.403183	0.544842	not significant
	Cdh5	92.6525	79.055	0.407782	0.549087	not significant
	Ptgdr2	6.245	9.535	0.408311	0.549087	not significant
	Itga2b	8.98	13.775	0.408928	0.549087	not significant
	Hamp	5.215	7.705	0.409253	0.549087	not significant
	Mef2c	38.845	45.1725	0.412994	0.5529	not significant
	Fyn	175.002	201.415	0.413764	0.5529	not significant
	C5ar1	168.235	240.243	0.414306	0.5529	not significant
	Bmi1	92.9075	112.54	0.417353	0.555977	not significant
	Ms4a2	4.835	3.7425	0.420648	0.559067	not significant
	Il9	5.5675	10.03	0.421164	0.559067	not significant
	Map2k2	515.695	573.727	0.42491	0.563044	not significant
	Nup107	98.85	115.332	0.431242	0.569503	not significant
	Hc	9.93	11.185	0.431304	0.569503	not significant
	Atf1	168.465	183.46	0.432086	0.569533	not significant
	Ccl12	164.83	220.608	0.434796	0.5721	not significant
	Cx3cr1	28.79	17.335	0.435559	0.572101	not significant
	Tgfb2	80.27	71.8675	0.439713	0.576546	not significant
	Ncr1	13.6525	16.2225	0.440941	0.577147	not significant
	Cd47	1276.73	1449.83	0.445433	0.581424	not significant
	Il17b	6.7325	8.715	0.445758	0.581424	not significant
	Abcb1a	32.29	43.52	0.451259	0.58721	not significant
	Siglec1	54.005	82.8425	0.4521	0.58721	not significant
	Ccl28	8.9225	7.0675	0.452543	0.58721	not significant
	Tcf7	112.127	104.528	0.456867	0.591797	not significant
	Tirap	52.975	65.0525	0.457934	0.592155	not significant
	Lrp1	743.375	844.69	0.459308	0.592911	not significant
	Ccl26	2.9375	3.4675	0.461245	0.594388	not significant
	C8b	9.255	12.55	0.464249	0.597233	not significant
	Spink5	3.0875	4.2925	0.466011	0.598473	not significant
	Angpt2	195.25	143.335	0.466829	0.598499	not significant
	Cxcl12	122.132	179.51	0.468309	0.599372	not significant
	Map4k2	89.6175	98.21	0.469936	0.600429	not significant
	Ddx58	651.392	757.53	0.47781	0.607453	not significant
	Aicda	7.19	9.9525	0.477812	0.607453	not significant
	Ubc	4887.64	5170.56	0.478474	0.607453	not significant
	Cdh1	25.1725	29.28	0.478673	0.607453	not significant
	Yy1	840.577	882.717	0.480876	0.609155	not significant
	Marco	224.562	139.517	0.482303	0.609155	not significant
	Mpped1	2.31	3.595	0.482451	0.609155	not significant
	Blnk	15.2425	18.1125	0.484657	0.610912	not significant
	Ifi27	1076.91	1185.22	0.494175	0.621865	not significant
	Tlr5	6.935	9.955	0.497431	0.624845	not significant
	Cd276	90.4525	76.05	0.500013	0.624845	not significant
	Ccl27a	6.56	8.395	0.500395	0.624845	not significant
	Epcam	12.1825	17.635	0.500641	0.624845	not significant
	H2-Q1	3.23	4.2375	0.500709	0.624845	not significant
	Txnip	386.085	445.82	0.501977	0.625386	not significant
	Il13ra2	58.1075	64.4025	0.505419	0.627786	not significant
	Ulbp1	111.502	124.935	0.505577	0.627786	not significant
	Fcgr3	201.095	271.2	0.507845	0.62956	not significant
	H60a	2.1475	2.7775	0.51031	0.631572	not significant
	Jun	1079.03	964.19	0.515253	0.636639	not significant
	Icam2	45.0975	38.76	0.517867	0.638816	not significant
	Cfp	111.118	166.837	0.522973	0.642479	not significant
	Il17f	7.635	12.625	0.523186	0.642479	not significant
	Card9	6.07	8.78	0.523406	0.642479	not significant
	Nefl	3.9625	4.8125	0.527447	0.645807	not significant
	Spp1	29366.9	25542.2	0.52784	0.645807	not significant
	Fcgr2b	494.067	676.215	0.535109	0.653635	not significant
	Msr1	226.363	311.013	0.537243	0.655174	not significant
	Myc	1285.87	1160.6	0.539698	0.6571	not significant
	Il22ra2	4.2025	4.645	0.540995	0.65742	not significant
	Jam3	98.28	90.9175	0.541714	0.65742	not significant
	H2-Ob	22.6025	27.7375	0.543865	0.658963	not significant
	Axl	828.717	875.018	0.548421	0.663412	not significant
	Ltbr	349.403	363.91	0.551208	0.66571	not significant
	Cd22	11.9225	14.9125	0.552568	0.666173	not significant
	C9	4.35	7.165	0.553368	0.666173	not significant
	Dll4	19.02	23.195	0.557088	0.668759	not significant
	Akt3	373.725	344.482	0.557299	0.668759	not significant
	Il1rap	234.68	249.01	0.559848	0.670544	not significant
	Cd46	1.495	1.9275	0.560575	0.670544	not significant
	Vcam1	928.365	1061.52	0.563065	0.672451	not significant
	Il2rg	91.1775	107.415	0.565078	0.673782	not significant
	Saa1	5.655	9.085	0.571393	0.680229	not significant
	Il18	42.7925	55.7325	0.584232	0.693546	not significant
	Clu	1263.05	1124.18	0.584428	0.693546	not significant
	Tnfsf12	82.0125	78.095	0.590263	0.699051	not significant
	Cfh	186.718	219.105	0.590931	0.699051	not significant
	Klra17	12.2725	9.275	0.593857	0.701406	not significant
	Atg5	102.715	109.968	0.595997	0.702826	not significant
	Abca1	153.22	183.707	0.599624	0.705994	not significant
	Fcgr1	264.312	346.217	0.602276	0.708005	not significant
	Klra15	2.62	3.425	0.603775	0.708656	not significant
	Erbb2	163.065	151.905	0.606439	0.710671	not significant
	Mapk3	851.57	910.638	0.610827	0.714113	not significant
	H2-Ea-ps	2.005	2.5725	0.611865	0.714113	not significant
	Glycam1	1.72	1.995	0.612233	0.714113	not significant
	Mcam	116.797	133.417	0.616563	0.717326	not significant
	Flt3	12.935	15.99	0.616901	0.717326	not significant
	Bax	205.762	195.21	0.626522	0.726622	not significant
	Tnfrsf10b	198.477	216.017	0.626832	0.726622	not significant
	Emr1	124.542	161.91	0.632412	0.731959	not significant
	Mrc1	248.293	318.308	0.651055	0.752375	not significant
	Pla2g1b	7.285	9.8125	0.652283	0.752635	not significant
	Stat5b	163.625	173.09	0.657343	0.757307	not significant
	Psen1	254.95	266.748	0.662026	0.761532	not significant
	Cxcl13	37.5475	31.3325	0.667623	0.762897	not significant
	Fap	95.445	85.7075	0.668116	0.762897	not significant
	Syt17	9.725	8.44	0.668152	0.762897	not significant
	Nrp1	258.085	233.283	0.668206	0.762897	not significant
	Cd9	1712.88	1536.64	0.668298	0.762897	not significant
	Atg12	228.615	237.975	0.672269	0.766264	not significant
	Tnfsf8	5.36	5.92	0.673844	0.766893	not significant
	Twist1	198.425	186.318	0.675767	0.767917	not significant
	Eng	81.17	74.3875	0.680458	0.772078	not significant
	Map3k7	231.715	246.682	0.687107	0.778444	not significant
	Ifi44	1151.85	1241.24	0.69493	0.78612	not significant
	Klra21	5.03	4.5475	0.702603	0.793603	not significant
	Trem2	95.3475	112.405	0.711326	0.801493	not significant
	Sigirr	161.442	168.67	0.711922	0.801493	not significant
	Mmp9	213.345	238.942	0.712795	0.801493	not significant
	Il3	3.4375	3.0375	0.717988	0.806124	not significant
	Chit1	5.65	6.8175	0.72035	0.807568	not significant
	Vwf	38.3775	43.2925	0.72201	0.80822	not significant
	Il1rapl2	4.4525	5.575	0.726774	0.812341	not significant
	Vim	11800.6	11398.6	0.731843	0.816789	not significant
	Map3k5	62.6725	66.6275	0.735735	0.818929	not significant
	Usp9y	2.14	2.41	0.735945	0.818929	not significant
	Fcgr4	459.835	561.497	0.740831	0.821863	not significant
	Cxcr5	3.7375	4.475	0.741047	0.821863	not significant
	Elk1	10.6325	11.76	0.741869	0.821863	not significant
	Irf3	169.458	161.31	0.756801	0.837169	not significant
	Pdgfc	122.585	111.2	0.757968	0.837225	not significant
	Ilf3	313.442	322.473	0.760083	0.838327	not significant
	C8g	15.5375	16.3475	0.76754	0.845308	not significant
	Cd27	4.8575	5.7825	0.773763	0.850913	not significant
	Flt3l	46.1025	47.445	0.787752	0.865028	not significant
	Cd48	134.68	150.243	0.791668	0.868057	not significant
	Sh2d1b1	22.4325	19.2625	0.793883	0.869215	not significant
	Traf3	115.225	121.048	0.795076	0.869252	not significant
	Ifi35	850.442	881.143	0.798262	0.871122	not significant
	Ifit1	486.383	502.73	0.800096	0.871122	not significant
	S100b	6.8775	7.4825	0.800271	0.871122	not significant
	Angpt1	68.655	71.51	0.811068	0.881596	not significant
	Clec4a2	83.5125	75.02	0.813183	0.882615	not significant
	Tnfsf4	7.86	9.135	0.814645	0.882925	not significant
	Il23a	20.9675	19.4675	0.816969	0.883307	not significant
	Ctsl	1502.51	1452.96	0.817353	0.883307	not significant
	Ly86	142.942	165.725	0.819098	0.883726	not significant
	F13a1	201.093	224.1	0.820736	0.883726	not significant
	Tgfb3	125.368	132.368	0.821276	0.883726	not significant
	Ifnar2	350.812	358.928	0.830075	0.891915	not significant
	Apoe	2068.97	2377.64	0.834106	0.894963	not significant
	Il10	7.1575	6.6775	0.837825	0.897337	not significant
	Il5	3.9275	4.27	0.838711	0.897337	not significant
	Lamp1	3725.76	3811.95	0.845101	0.902886	not significant
	Cd44	24.6575	23.89	0.849203	0.905977	not significant
	C1qa	776.372	877.658	0.852236	0.907922	not significant
	Ecsit	87.7425	86.4	0.853829	0.908329	not significant
	Mapkapk2	348.355	356.503	0.861932	0.91565	not significant
	Kit	15.105	15.6875	0.868321	0.91989	not significant
	Cxcl16	129.528	142.467	0.868377	0.91989	not significant
	Tnfrsf11a	23.6275	25.8875	0.87097	0.921337	not significant
	Vegfa	321.455	331.165	0.87293	0.921385	not significant
	Tnfrsf9	45.06	43.42	0.873473	0.921385	not significant
	Rrad	227.16	230.652	0.881483	0.925475	not significant
	Lamp2	1875.85	1894.65	0.881819	0.925475	not significant
	Cd200	50.22	51.725	0.88228	0.925475	not significant
	Lyve1	98.025	91.6975	0.882286	0.925475	not significant
	Cd163	34.7475	37.485	0.891076	0.932424	not significant
	Tlr8	58.15	54.2125	0.891397	0.932424	not significant
	Vegfc	140.385	134.4	0.89616	0.934951	not significant
	Pvrl2	166.15	162.925	0.896307	0.934951	not significant
	Ifitm1	514.658	499.885	0.897938	0.935072	not significant
	Anxa1	3402.41	3327.1	0.898916	0.935072	not significant
	Smad2	294.355	292.265	0.904857	0.939949	not significant
	Foxj1	4.15	4.3725	0.911533	0.945573	not significant
	Pou2f2	10.9325	10.31	0.916443	0.947653	not significant
	Pla2g6	86.1125	87.22	0.918105	0.947653	not significant
	Nfatc3	192.955	195.688	0.918323	0.947653	not significant
	Hmgb1	1386.83	1404.81	0.918592	0.947653	not significant
	Ltk	3.1175	3.015	0.923219	0.951119	not significant
	Psmb7	1548.8	1562.16	0.924994	0.95164	not significant
	H2-D1	11519.5	11602.8	0.931022	0.956529	not significant
	Ncam1	283.728	279.325	0.936865	0.961215	not significant
	Myd88	179.343	177.645	0.940084	0.963201	not significant
	Col4a1	417.11	412.102	0.950205	0.972242	not significant
	Hsd11b1	384.055	378.933	0.963805	0.981321	not significant
	Lbp	120.24	119.16	0.96455	0.981321	not significant
	Tmed1	370.465	369.118	0.965763	0.981321	not significant
	Prkce	72	72.62	0.965964	0.981321	not significant
	Ada	251.718	252.74	0.966334	0.981321	not significant
	C1qb	1211.08	1240.9	0.96744	0.981321	not significant
	Cd63	10875.3	10832	0.968922	0.981321	not significant
	Pdgfrb	116.25	115.175	0.969546	0.981321	not significant
	Masp1	15.6375	15.7575	0.973545	0.982678	not significant
	Igll1	6.99	7.11	0.974657	0.982678	not significant
	Il17ra	192.985	194.07	0.974817	0.982678	not significant
	Tlr7	37.695	37.2125	0.976918	0.983475	not significant
	Dusp6	564.127	560.757	0.98055	0.985808	not significant
	Msln	167.23	166.382	0.984339	0.987424	not significant
	Ifitm2	5766.96	5756.39	0.98479	0.987424	not significant
	Lgals3	14496.7	14546.3	0.989111	0.990432	not significant
	Rorc	25.5	25.4375	0.994905	0.994905	not significant
